# Supplementary material for: Structure and photoluminescence of Eu3+ doped Sr2InTaO6 red phosphor with high color purity
Source: Royal Society of Chemistry journal article supplement (doi:10.1039/d1ra00165e), 2021-01-01
Supplement: d1ra00165e1.pdf [file d1ra00165e1.pdf]

## Supporting information

### **Structure and Photoluminescence of Eu<sup>3+</sup> Doped Sr<sub>2</sub>InTaO<sub>6</sub> Red Phosphor with High Color Purity**

Jingfen Zhao <sup>a</sup>, Hui Gao <sup>a</sup>, Hui Xu <sup>a</sup>, Zhiwei Zhao <sup>b</sup>, Hongxia Bu <sup>a</sup>, Xuefei  
Cao <sup>a</sup>, Lining He <sup>a</sup>, Zaifa Yang <sup>a\*</sup> and Jiayue Sun <sup>c</sup>

<sup>a</sup> College of Physics and Electronic Engineering, Qilu Normal University,  
Jinan, 250200, PR China, E-mail: fazaiyang@163.com, Tel./fax: +86  
1066778147 (Z.F. Yang)

<sup>b</sup> College of Automobile and Electronic Engineering, Baoding University,  
Baoding, 071000, PR China

<sup>c</sup> School of Science, Beijing Technology and Business University, Beijing,  
100048, PR China

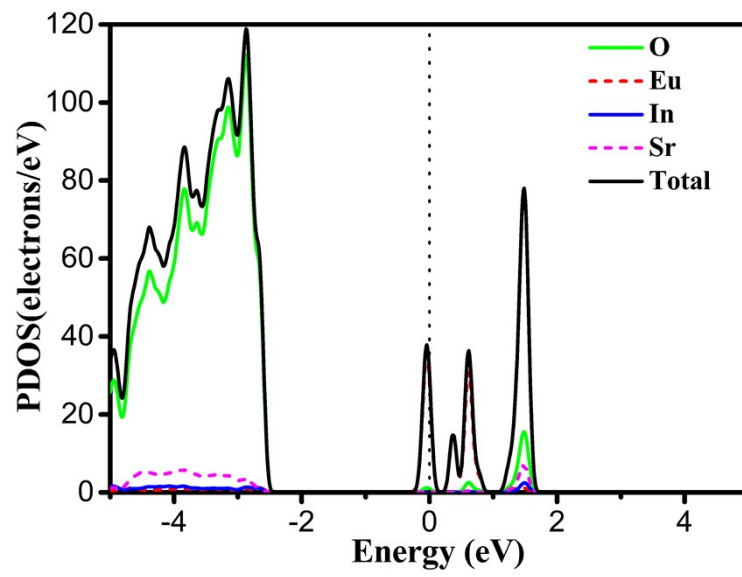

**Figure S1** The corresponding projected density of states of host Sr<sub>2</sub>InTaO<sub>6</sub>:0.12Eu<sup>3+</sup>.

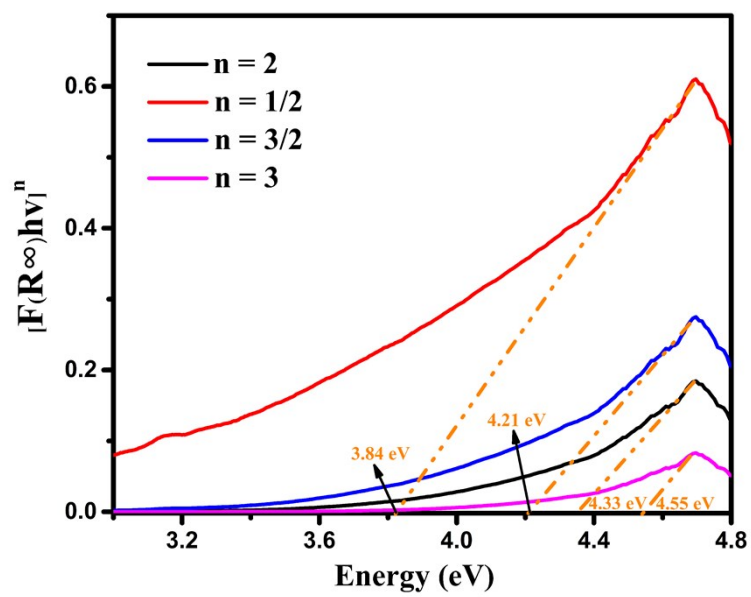

**Figure S2** absorption spectra of  $\text{Sr}_2\text{InTaO}_6$  as calculated by the Kubelka-Munk function for different  $n$  indexes ( $n = 1/2, 2, 3/2$  and  $3$ ).

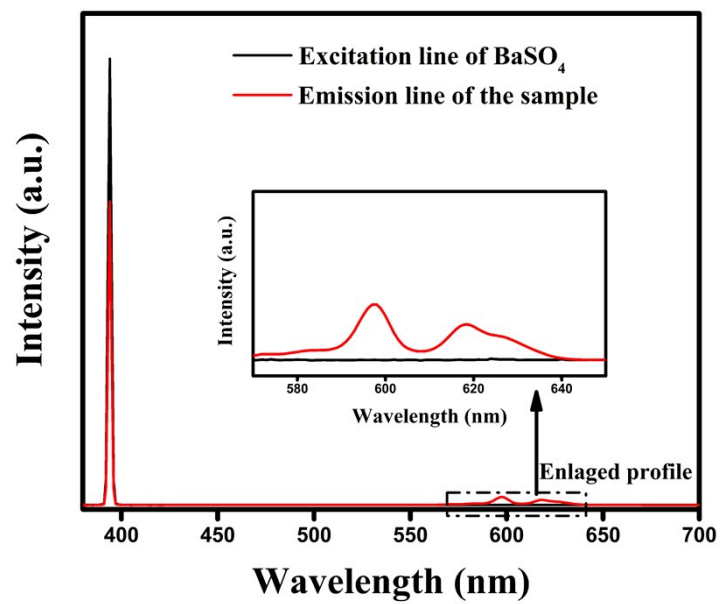

**Figure S3** Excitation line of BaSO<sub>4</sub> and emission spectrum of Sr<sub>2</sub>InTaO<sub>6</sub>:0.12Eu<sup>3+</sup> phosphor collected by using an integrating sphere.

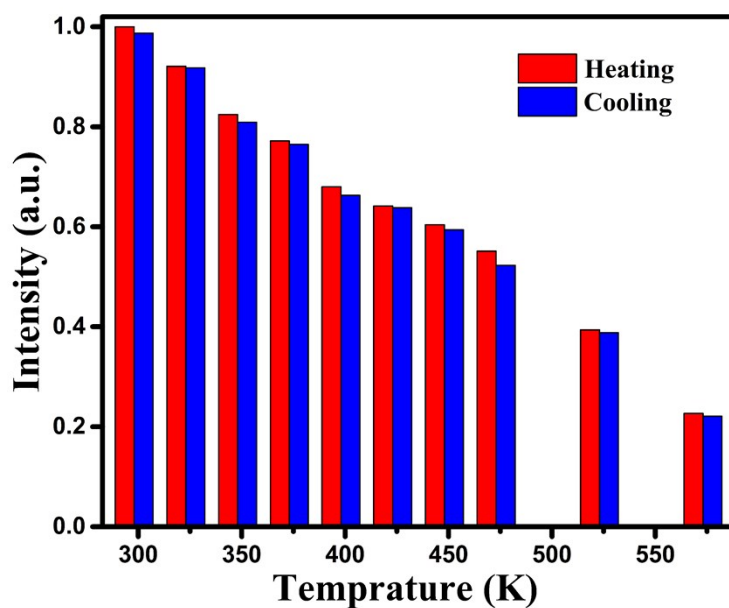

**Figure S4** The temperature-dependent PL properties of the  $\text{Sr}_2\text{InTaO}_6:0.12\text{Eu}^{3+}$  phosphor under 394 nm excitation in the heating and cooling process over 298–573 K
